# Supplementary material for: Competing-risk analysis of coronavirus disease 2019 in-hospital mortality in a Northern Italian centre from SMAtteo COvid19 REgistry (SMACORE)
Source: PubMed Central journal article supplement (PMC7806993; doi:10.1038/s41598-020-80679-2), 2021-01-13

Figure S1.

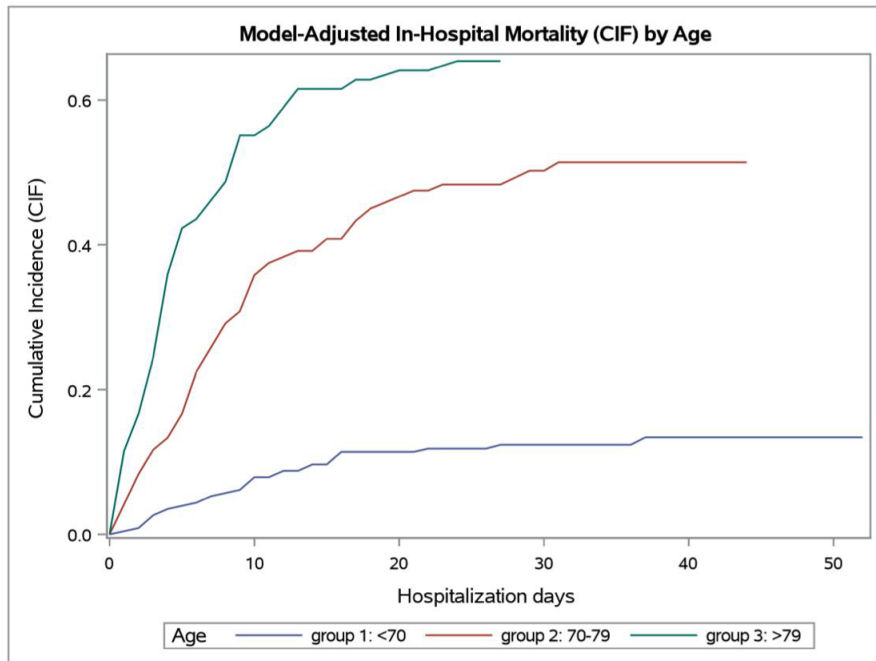

**Figure S2**

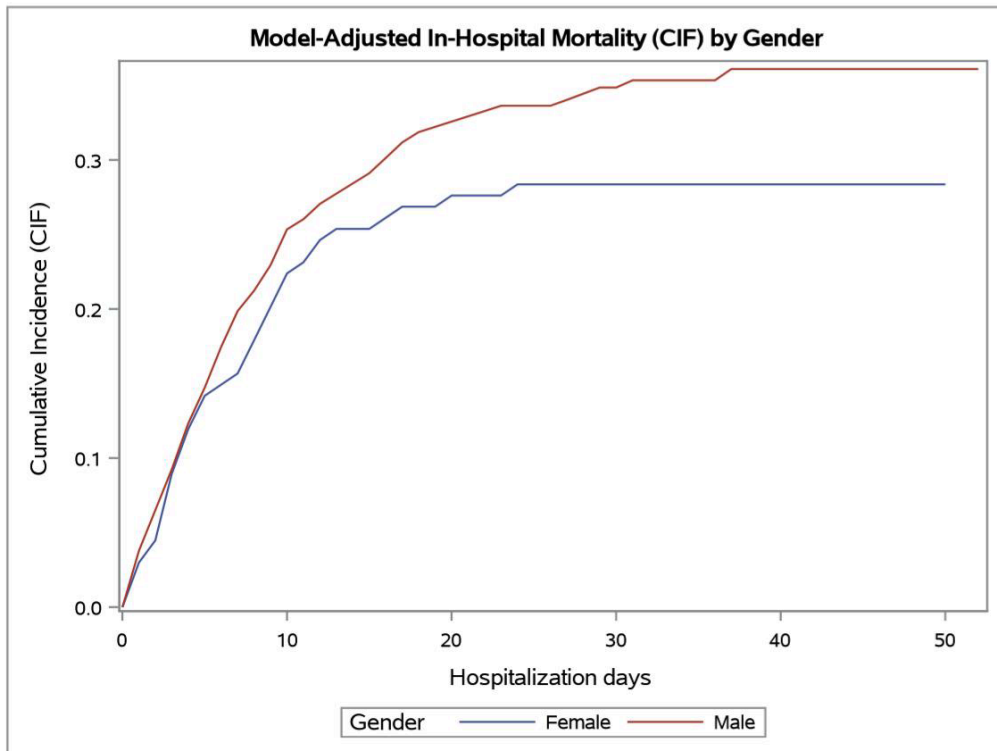

Figure S3

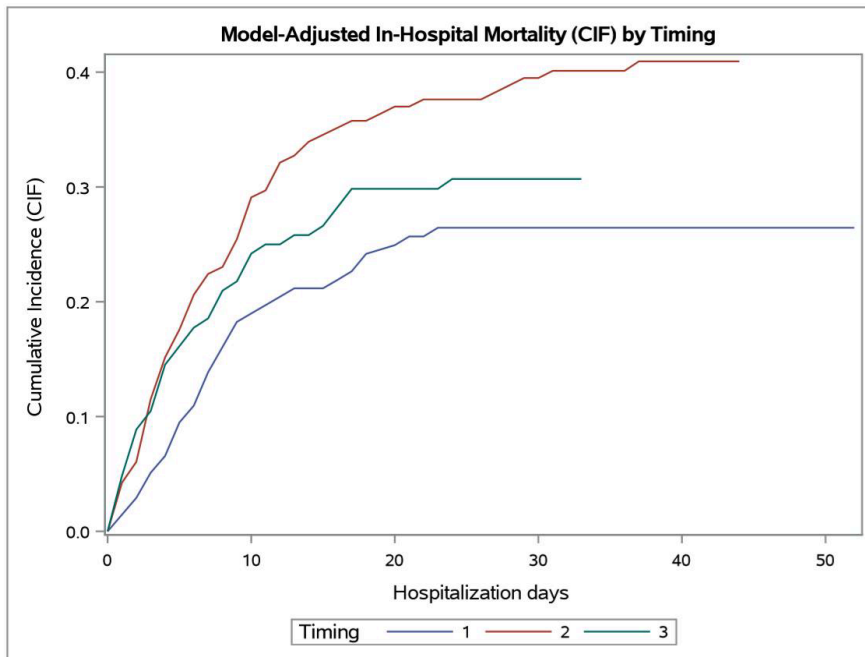

Figure S4

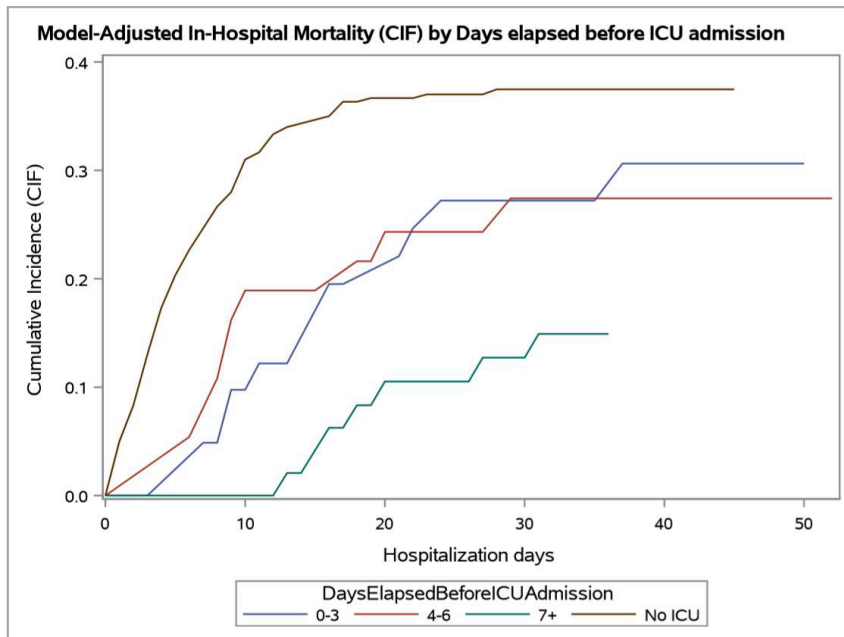

Figure S5

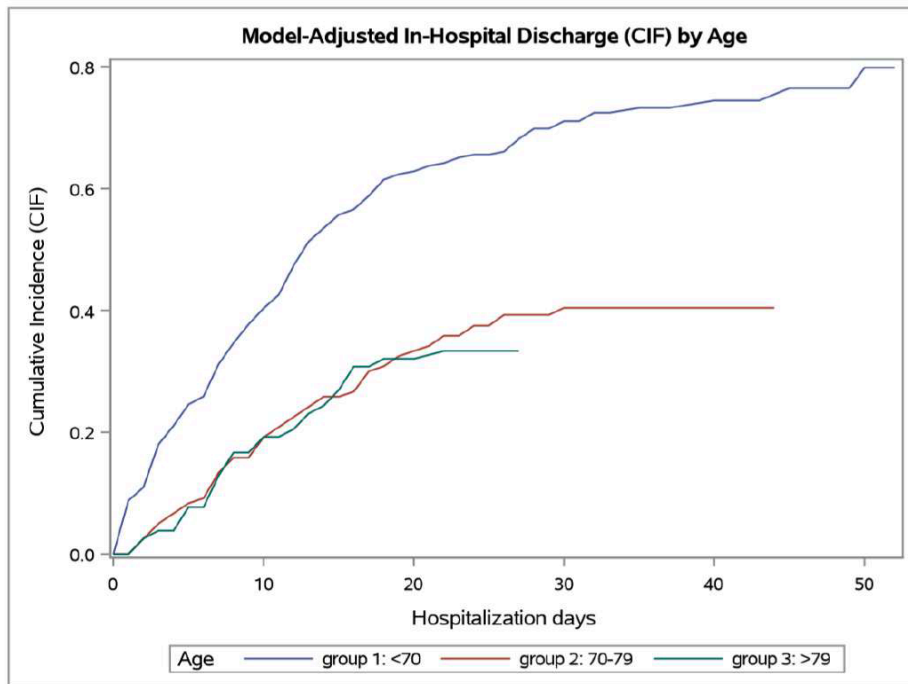

Figure S6

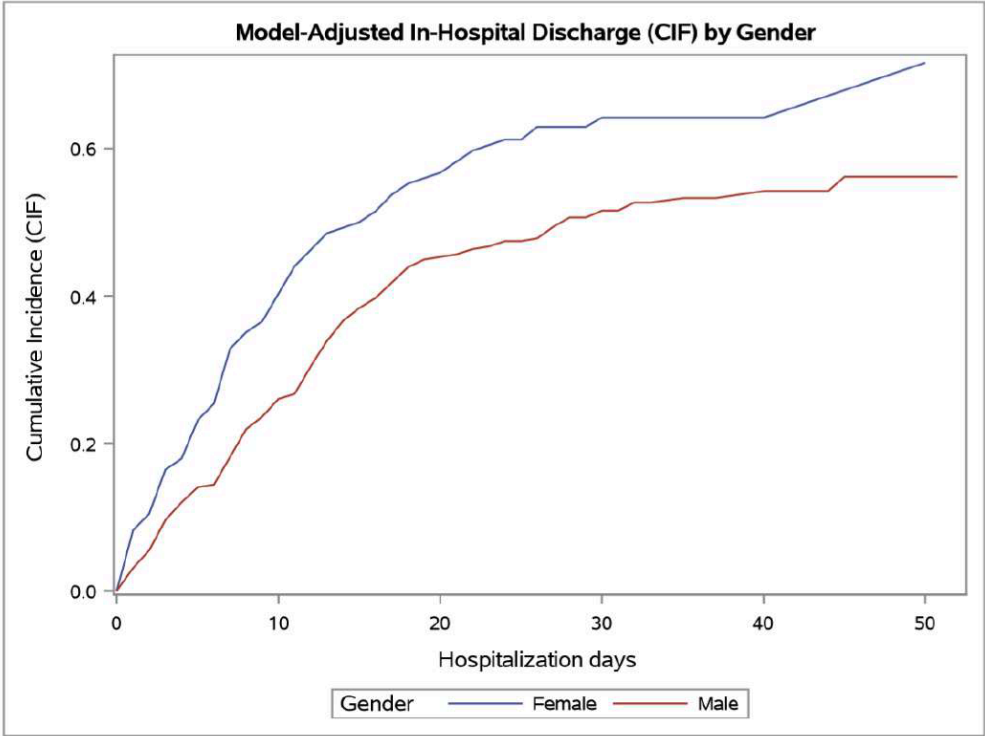

Figure S7

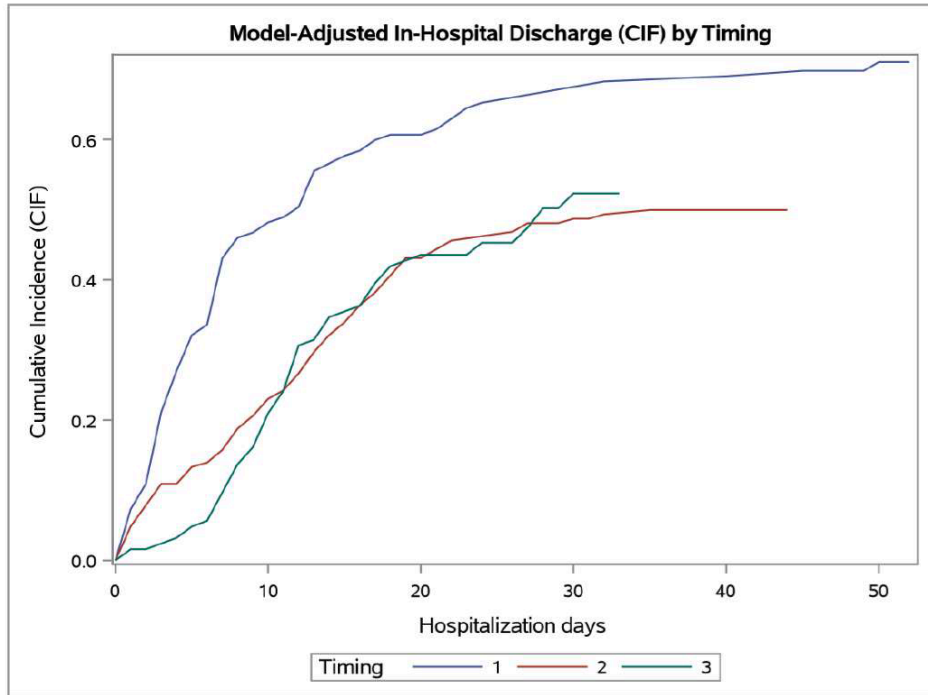

Figure S8

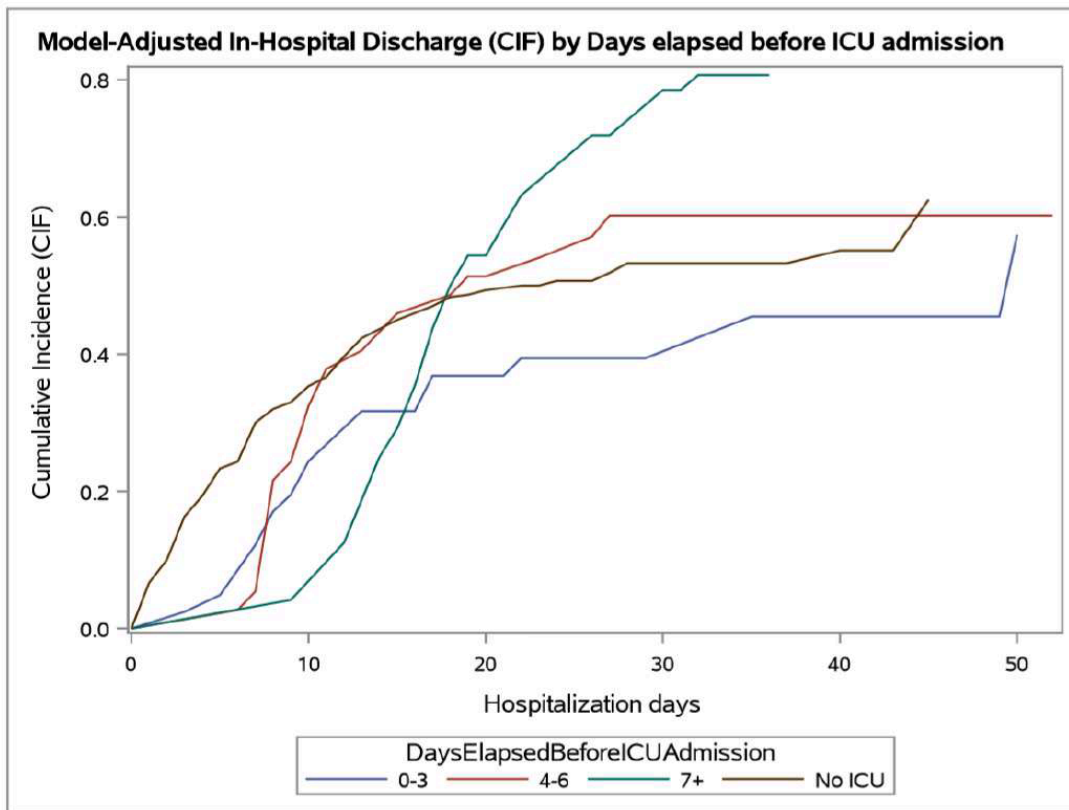



Figure S9

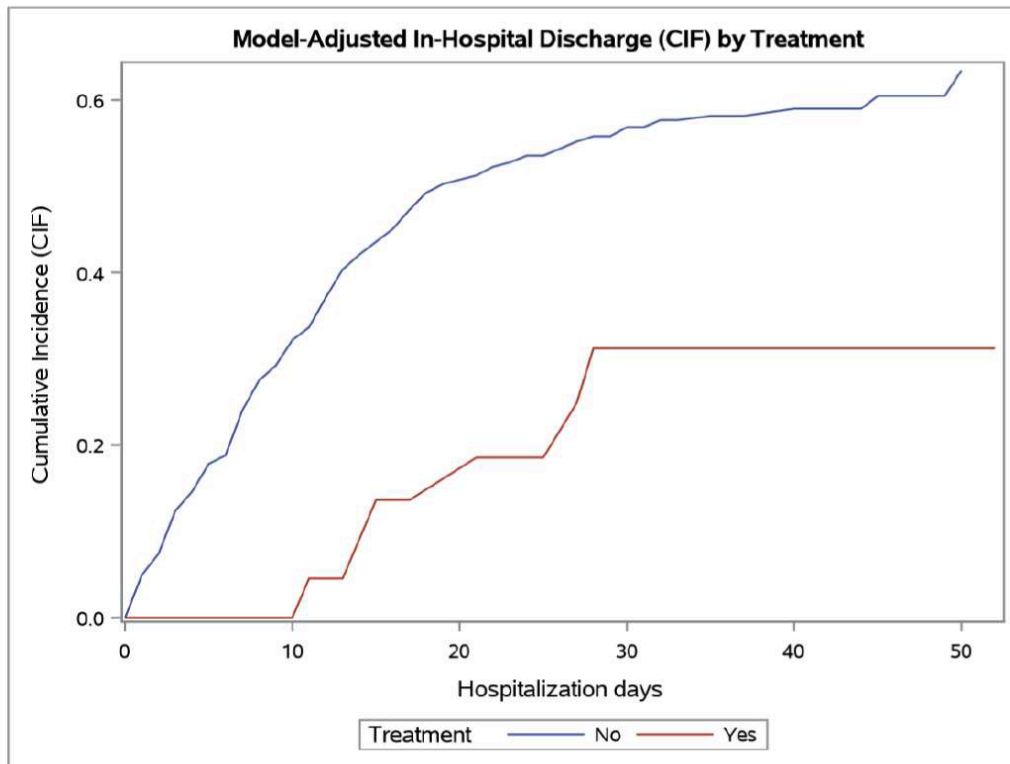

Figure S10

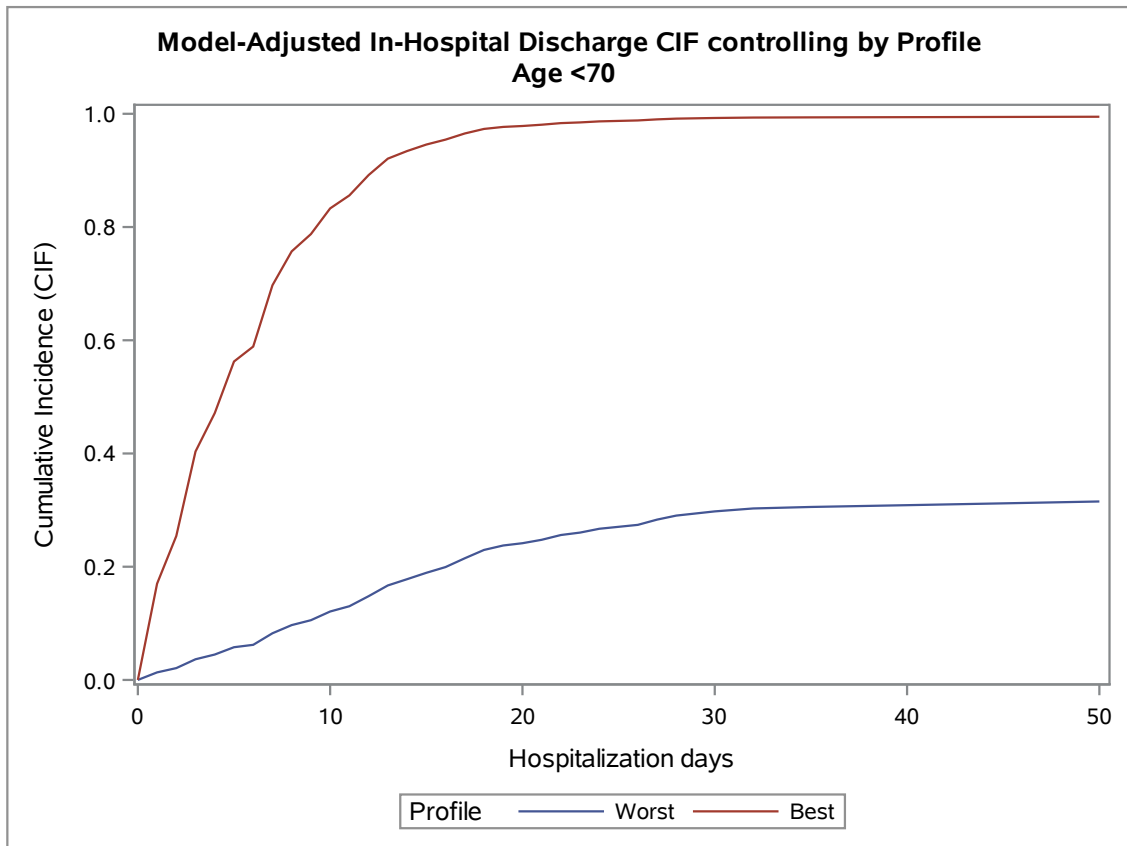

Figure S11

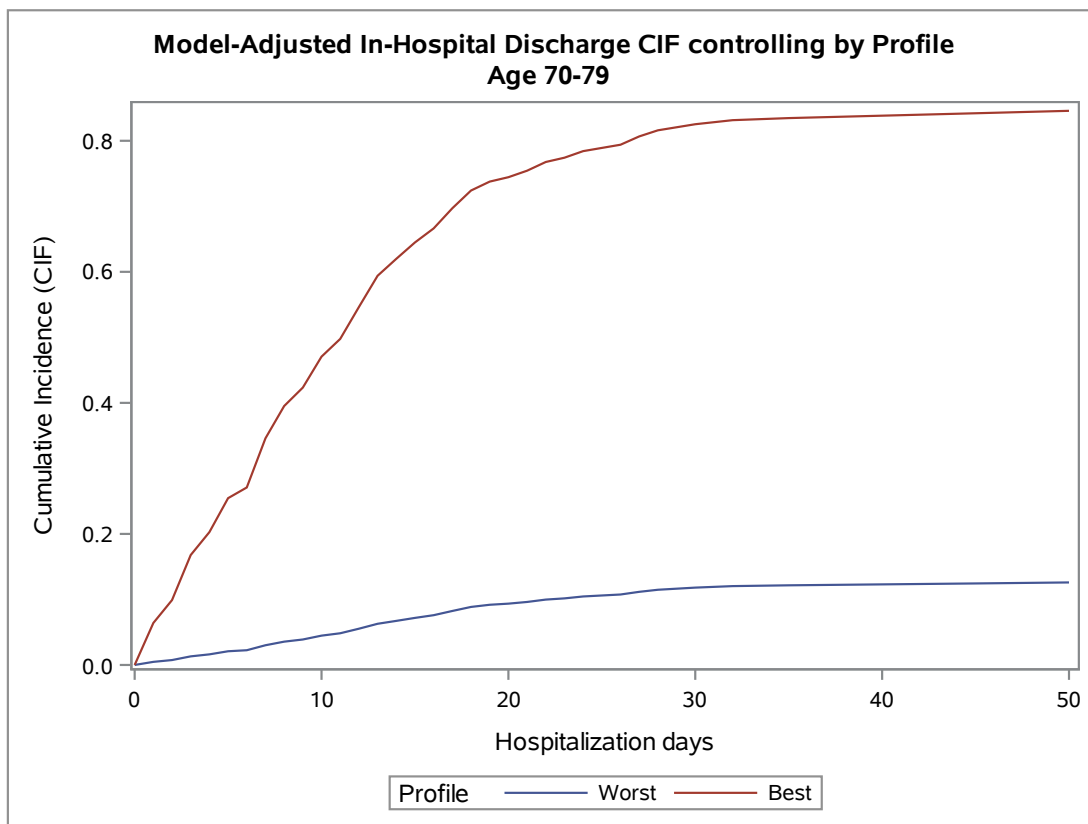

Figure S12

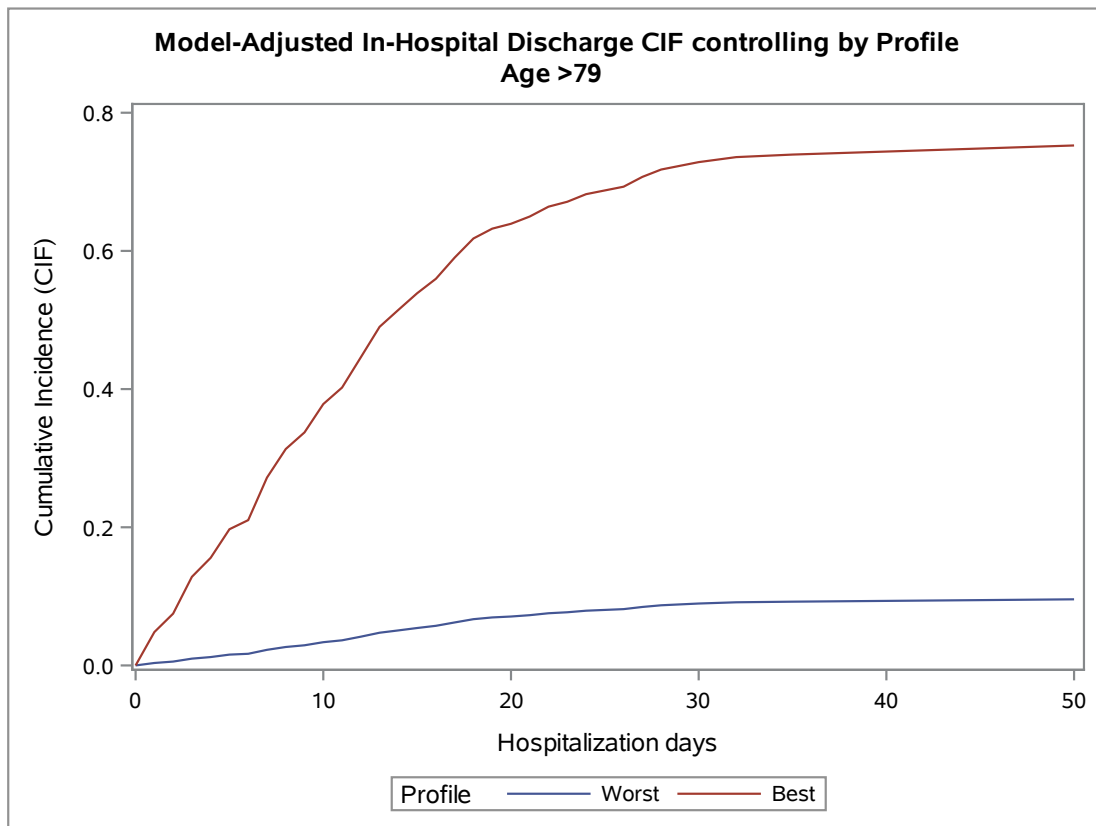

Supplement: 41598_2020_80679_MOESM1_ESM.pdf [file 41598_2020_80679_MOESM1_ESM.pdf]
