# Supplementary material for: Competing-risk analysis of coronavirus disease 2019 in-hospital mortality in a Northern Italian centre from SMAtteo COvid19 REgistry (SMACORE)
Source: PubMed Central journal article supplement (PMC7806993; doi:10.1038/s41598-020-80679-2), 2021-01-13
Supplement: 41598_2020_80679_MOESM2_ESM.pdf [file 41598_2020_80679_MOESM2_ESM.pdf]

**Table S1.** Treatments and outcomes of patients stratified according to death.

|                                                          | Death<br>(n=141) | Survivor<br>(n=285) | <i>p</i> -value |
|----------------------------------------------------------|------------------|---------------------|-----------------|
| <b>Treatments</b>                                        |                  |                     |                 |
| Lopinavir/ritonavir                                      | 66/119 (55.5%)   | 108/235 (46.0%)     | 0.115           |
| Hydroxychloroquine                                       | 92/119 (77.3%)   | 157/232 (67.7%)     | 0.079           |
| Corticosteroids                                          | 21/119 (17.6%)   | 49/230 (21.3%)      | 0.504           |
| Antibiotics                                              | 109/120 (90.8%)  | 195/238 (81.9%)     | 0.039           |
| Tocilizumab                                              | 8 (5.7%)         | 14 (4.9%)           | 0.919           |
| <b>Outcomes</b>                                          |                  |                     |                 |
| Admission to ICU                                         | 22 (15.6%)       | 19 (6.7%)           | 0.006           |
| Median time from hospitalization to ICU admission (days) | 4 (2-6)          | 3 (2-6)             | 0.854           |
| Respiratory Failure                                      | 119 (84.4%)      | 126 (44.2%)         | <0.0001         |
| Acute kidney injury                                      | 20 (14.2%)       | 6 (2.1%)            | <0.0001         |
| Acute cardiac injury                                     | 11 (7.8%)        | 3 (1.0%)            | 0.0007          |
| Septic Shock                                             | 7 (4.9%)         | 0 (0)               | 0.0007          |
| Thromboembolic events                                    | 2 (1.4%)         | 5 (1.8%)            | 0.882           |

**Table S2** Outcomes of hospitalized COVID-19 patients according to Charlson Comorbidity Index.

|                                                          | N=426       | Charlson Comorbidity Index <3 (n=183) | Charlson Comorbidity Index ≥3 (n=243) | p-value |
|----------------------------------------------------------|-------------|---------------------------------------|---------------------------------------|---------|
| <b>Outcomes</b>                                          |             |                                       |                                       |         |
| Death                                                    | 141 (33.1%) | 19 (10.4%)                            | 122 (50.2%)                           | <0.001  |
| Median time from symptoms onset to death (days)          | 11 (3-19)   | 18 (11-21)                            | 14 (11-18)                            | 0.519   |
| Median time from hospitalization to death (days)         | 6 (3-11)    | 10 (7-16)                             | 6 (3-10)                              | 0.014   |
| Admission to ICU                                         | 41 (9.6%)   | 21 (11.4%)                            | 20 (8.2%)                             | 0.105   |
| Median time from symptoms onset to ICU admission (days)  | 11 (8-13)   | 12 (6-15)                             | 8 (6-11)                              | 0.643   |
| Median time from hospitalization to ICU admission (days) | 4 (2-6)     | 3 (2-7)                               | 5 (1-6)                               | 0.691   |
| Discharge                                                | 239 (56.1%) | 141 (77.0%)                           | 98 (40.3%)                            | <0.001  |
| Median time from symptoms onset to discharge (days)      | 19 (9-24)   | 19 (13-26)                            | 21 (16-25)                            | 0.344   |
| Median time from hospitalization to discharge (days)     | 10 (5-16)   | 8 (3-14)                              | 12 (7-17)                             | 0.004   |
| Respiratory Failure                                      | 245 (57.5%) | 87 (47.5%)                            | 158 (65.0%)                           | <0.001  |
| Acute kidney injury                                      | 26 (6.1%)   | 3 (1.6%)                              | 23 (9.4%)                             | 0.002   |
| Acute cardiac injury                                     | 14 (3.3%)   | 2 (1.1%)                              | 12 (4.9%)                             | 0.083   |
| Septic Shock                                             | 7 (1.6%)    | 3 (1.6%)                              | 4 (1.6%)                              | 0.711   |
| Thromboembolic events                                    | 7 (1.6%)    | 4 (2.2%)                              | 3 (1.2%)                              | 0.687   |

**Table S3.** Outcomes of hospitalized COVID-19 patients according to modified Elixhauer score.

|                                                          | N=426       | Modified Elixhauer score < 9 (n=213) | Modified Elixhauer score ≥9 (n=213) | p-value |
|----------------------------------------------------------|-------------|--------------------------------------|-------------------------------------|---------|
| <b>Outcomes</b>                                          |             |                                      |                                     |         |
| Death                                                    | 141 (33.1%) | 20 (9.3%)                            | 121 (56.8%)                         | <0.001  |
| Median time from symptoms onset to death (days)          | 11 (3-19)   | 19.5 (18-23)                         | 14 (9.0-19)                         | 0.068   |
| Median time from hospitalization to death (days)         | 6 (3-11)    | 10 (4.5-13)                          | 6 (3-10.5)                          | 0.127   |
| Admission to ICU                                         | 41 (9.6%)   | 29 (13.6%)                           | 12 (5.6%)                           | 0.229   |
| Median time from symptoms onset to ICU admission (days)  | 11 (8-13)   | 13 (11-15)                           | 6 (3.5-10)                          | 0.050   |
| Median time from hospitalization to ICU admission (days) | 4 (2-6)     | 3 (2-5)                              | 3.5 (2-5.5)                         | 0.986   |
| Discharge                                                | 239 (56.1%) | 175 (82.2%)                          | 64 (30.0%)                          | <0.001  |
| Median time from symptoms onset to discharge (days)      | 19 (9-24)   | 19 (13-26)                           | 21 (17.5-26)                        | 0.431   |
| Median time from hospitalization to discharge (days)     | 10 (5-16)   | 9 (4-15)                             | 12 (6-17)                           | 0.076   |
| Respiratory Failure                                      | 245 (57.5%) | 128 (60.0%)                          | 117 (54.9%)                         | <0.001  |
| Acute kidney injury                                      | 26 (6.1%)   | 10 (4.7%)                            | 16 (7.5%)                           | 0.027   |
| Acute cardiac injury                                     | 14 (3.3%)   | 5 (2.3%)                             | 9 (4.2%)                            | 0.093   |
| Septic Shock                                             | 7 (1.6%)    | 2 (0.1%)                             | 5 (2.3%)                            | 0.848   |
| Thromboembolic events                                    | 7 (1.6%)    | 2 (0.1%)                             | 5 (2.3%)                            | 0.848   |

**Table S4.** Competing risk analysis by univariate Fine and Gray model for in-hospital mortality and discharge.

|                                           | Fine and Grey model   |                |              |         |           |                |              |         |
|-------------------------------------------|-----------------------|----------------|--------------|---------|-----------|----------------|--------------|---------|
|                                           | In-hospital mortality |                |              |         | Discharge |                |              |         |
|                                           | Beta                  | Standard Error | Hazard ratio | p value | Beta      | Standard Error | Hazard Ratio | p value |
| Age 70-79 years                           | 1.56                  | 0.24           | 4.77         | <0.0001 | -0.91     | 0.17           | 0.40         | <0.0001 |
| Age > 80 years                            | 2.06                  | 0.25           | 7.83         | <0.0001 | -1.16     | 0.22           | 0.31         | <0.0001 |
| Male sex                                  | 0.30                  | 0.27           | 1.35         | 0.142   | -0.43     | 0.14           | 0.65         | 0.003   |
| Number of comorbidities                   | 0.41                  | 0.07           | 1.50         | <0.0001 | -0.42     | 0.08           | 0.66         | <0.0001 |
| Hypertension                              | 0.21                  | 0.19           | 1.24         | 0.260   | -0.19     | 0.14           | 0.82         | 0.165   |
| Diabetes                                  | 0.43                  | 0.23           | 1.54         | 0.062   | -0.40     | 0.19           | 0.67         | 0.038   |
| Atrial fibrillation                       | 0.85                  | 0.25           | 2.34         | 0.001   | -0.75     | 0.29           | 0.47         | 0.011   |
| Coronary heart disease                    | 1.16                  | 0.23           | 3.18         | <0.0001 | -1.23     | 0.35           | 0.29         | 0.001   |
| Chronic heart failure                     | 0.55                  | 0.28           | 1.74         | 0.050   | -0.64     | 0.38           | 0.53         | 0.093   |
| Chronic kidney disease                    | 1.11                  | 0.29           | 3.02         | 0.001   | -1.12     | 0.39           | 0.33         | 0.005   |
| Admission between March, 4 and March, 16  | 0.55                  | 0.22           | 1.74         | 0.012   | -0.52     | 0.16           | 0.60         | 0.002   |
| Admission between March, 17 and March, 30 | 0.21                  | 0.25           | 1.24         | 0.399   | -0.52     | 0.16           | 0.59         | 0.002   |
| Time to ICU admission > 7 days            | -0.60                 | 0.45           | 0.55         | 0.183   | 0.23      | 0.21           | 1.26         | 0.266   |
| No ICU admission                          | 0.63                  | 0.30           | 1.89         | 0.033   | -0.01     | 0.20           | 0.99         | 0.987   |
| Glutamic oxaloacetic transaminase, U/L    | -0.01                 | 0.01           | 1.00         | 0.559   | 0.01      | 0.01           | 1.00         | 0.909   |
| Glutamic pyruvic transaminase, U/L        | -0.01                 | 0.01           | 1.00         | 0.753   | -0.01     | 0.01           | 1.00         | 0.891   |
| Log (Creatinine, mg/dL)                   | 0.06                  | 0.12           | 1.06         | 0.617   | -0.07     | 0.12           | 0.93         | 0.527   |

|                                                   |       |      |      |       |       |      |      |       |
|---------------------------------------------------|-------|------|------|-------|-------|------|------|-------|
| Log (Lactate dehydrogenase, U/L)                  | 0.09  | 0.24 | 1.09 | 0.720 | -0.18 | 0.21 | 0.83 | 0.377 |
| Log (White Cell Blood Count, $\times 10^9$ per L) | -0.14 | 0.20 | 0.87 | 0.500 | 0.01  | 0.18 | 1.01 | 0.969 |
| Log (Lymphocyte Count, $\times 10^9$ per L)       | -0.35 | 0.17 | 0.71 | 0.043 | 0.45  | 0.15 | 1.56 | 0.003 |
| Log (Neutrophil Count, $\times 10^9$ per L)       | -0.01 | 0.15 | 0.99 | 0.940 | -0.08 | 0.14 | 0.92 | 0.552 |
| Platelet Count, $\times 10^9$ per L               | -0.31 | 0.20 | 0.73 | 0.119 | 0.29  | 0.17 | 1.33 | 0.097 |
| Lopinavir/ritonavir                               | 0.27  | 0.20 | 1.31 | 0.173 | -0.22 | 0.14 | 0.80 | 0.127 |
| Hydroxychloroquine                                | 0.44  | 0.22 | 1.56 | 0.043 | -0.34 | 0.15 | 0.71 | 0.027 |
| Corticosteroids                                   | -0.19 | 0.23 | 0.82 | 0.409 | -0.17 | 0.15 | 0.84 | 0.256 |
| Tocilizumab                                       | -0.01 | 0.32 | 0.99 | 0.968 | -1.05 | 0.38 | 0.35 | 0.005 |

**Table S5** Competing risk analysis by Fine and Gray model for in-hospital mortality and discharge including comorbidities.

|                                           | Fine and Grey model   |                |              |         |           |                |              |         |
|-------------------------------------------|-----------------------|----------------|--------------|---------|-----------|----------------|--------------|---------|
|                                           | In-hospital mortality |                |              |         | Discharge |                |              |         |
|                                           | Beta                  | Standard Error | Hazard ratio | p value | Beta      | Standard Error | Hazard Ratio | p value |
| Age                                       | 0.07                  | 0.01           | 1.08         | <0.0001 | -0.02     | 0.004          | 0.98         | <0.0001 |
| Male sex                                  | 0.52                  | 0.21           | 1.68         | 0.012   | -0.41     | 0.14           | 0.66         | 0.003   |
| Diabetes                                  | 0.16                  | 0.22           | 1.18         | 0.469   | -0.30     | 0.20           | 0.74         | 0.137   |
| Atrial fibrillation                       | 0.04                  | 0.26           | 1.04         | 0.871   | 0.08      | 0.31           | 1.09         | 0.785   |
| Coronary heart disease                    | 0.44                  | 0.24           | 1.56         | 0.059   | -0.46     | 0.35           | 0.63         | 0.193   |
| Chronic heart failure                     | -0.30                 | 0.31           | 0.74         | 0.336   | -0.07     | 0.40           | 0.94         | 0.870   |
| Chronic kidney disease                    | 0.31                  | 0.29           | 1.37         | 0.281   | -0.65     | 0.42           | 0.52         | 0.126   |
| Admission between March, 4 and March, 16  | 0.01                  | 0.18           | 1.01         | 0.939   | -0.20     | 0.14           | 0.82         | 0.163   |
| Lymphocyte Count, × 10 <sup>9</sup> per L | -0.20                 | 0.24           | 0.82         | 0.399   | 0.10      | 0.04           | 1.10         | 0.030   |
| Hydroxychloroquine                        | -0.05                 | 0.19           | 0.95         | 0.787   | -0.17     | 0.14           | 0.84         | 0.228   |
| Time to ICU admission                     | 0.06                  | 0.04           | 1.06         | 0.224   | -0.96     | 0.27           | 0.38         | 0.001   |

**Table S6.** Demographic, Clinical and Laboratory Characteristics of patients who have been discharged.

|             | Discharged (n=239) | Non-discharged (n=187)* | p-values |
|-------------|--------------------|-------------------------|----------|
| Age (years) | 61.0 (48.0-73.0)   | 73.0 (65.5-80.0)        | <0.0001  |
| <50         | 63 (26.4%)         | 9 (4.8%)                | <0.0001  |
| 50-59       | 45 (18.8%)         | 19 (10.2%)              | 0.019    |

|                                             |                   |                   |         |
|---------------------------------------------|-------------------|-------------------|---------|
| 60-69                                       | 57 (23.8%)        | 38 (20.3%)        | 0.453   |
| 70-79                                       | 50 (20.9%)        | 74 (39.6%)        | <0.0001 |
| >80                                         | 24 (10.0%)        | 47 (25.1%)        | 0.0001  |
| Male sex                                    | 153 (64.0%)       | 139 (74.3%)       | 0.030   |
| Comorbidity                                 | 130 (54.4%)       | 149 (79.7%)       | <0.0001 |
| Hypertension                                | 74 (31.0%)        | 67 (35.8%)        | 0.406   |
| Diabetes                                    | 29 (12.1%)        | 35 (18.7%)        | 0.110   |
| Atrial fibrillation                         | 12 (5.0%)         | 27 (14.4%)        | 0.003   |
| Coronary Heart Disease                      | 9 (3.8%)          | 32 (17.1%)        | <0.0001 |
| Obesity                                     | 13 (5.4%)         | 13 (7.0%)         | 0.718   |
| Chronic kidney disease                      | 6 (2.6%)          | 21 (11.2%)        | 0.001   |
| Chronic heart failure                       | 7 (2.9%)          | 16 (8.5%)         | 0.036   |
| Chronic Liver disease                       | 8 (3.3%)          | 14 (7.5%)         | 0.106   |
| Chronic obstructive lung disease            | 9 (3.8%)          | 11 (5.9%)         | 0.396   |
| History of malignancy                       | 12 (5.0%)         | 5 (2.7%)          | 0.416   |
| Active malignancy                           | 6 (2.6%)          | 10 (5.3%)         | 0.214   |
| Dementia                                    | 2 (0.9%)          | 12 (6.4%)         | 0.006   |
| Charlson comorbidity index                  | 2 (1-3)           | 4 (3-5)           | <0.0001 |
| Time from symptoms onset to hospitalization | 8 (4-11)          | 7 (4-10)          | 0.117   |
| Pneumonia at chest X-ray                    | 167 (69.9%)       | 134 (71.6%)       | 0.769   |
| Glutamic oxaloacetic transaminase, U/L      | 39 (27-55)        | 44 (31-69)        | 0.021   |
| Glutamic pyruvic transaminase, U/L          | 30 (20-43)        | 36 (23-57)        | 0.012   |
| C-reactive protein, mg/dL                   | 7.64 (3.59-14.51) | 10.4 (5.45-14.97) | 0.017   |
| Creatinine, mg/dL                           | 0.87 (0.83-0.91)  | 0.91 (0.75-1.19)  | 0.029   |
| Lactate dehydrogenase, U/L                  | 365 (278-445)     | 380 (329-451)     | 0.033   |
| Troponine, ng/L                             | 36 (10-109)       | 21 (10-101)       | 0.324   |
| White Cell Blood Count, $\times 10^9$ per L | 6.6 (5.4-9.1)     | 6.9 (5.1-9.2)     | 0.904   |

|                                       |                  |                  |       |
|---------------------------------------|------------------|------------------|-------|
| Lymphocyte Count, $\times 10^9$ per L | 0.8 (0.65-1.09)  | 0.74 (0.60-0.92) | 0.067 |
| Neutrophil Count, $\times 10^9$ per L | 5.07 (3.93-7.68) | 5.55 (3.72-8.00) | 0.478 |
| Platelet Count, $\times 10^9$ per L   | 206 (154-296)    | 202 (144-266)    | 0.199 |

\*Non-discharged patients include 46 patients still hospitalized at the end of follow-up.



**Table S7.** Treatments and outcomes of patients who have been discharged.

|                                           | Discharged<br>(n=239) | Non-discharged<br>(n=187)* | <i>p</i> -value |
|-------------------------------------------|-----------------------|----------------------------|-----------------|
| <b>Treatments</b>                         |                       |                            |                 |
| Lopinavir/ritonavir                       | 103/210 (49.0%)       | 71/144 (49.3%)             | 0.951           |
| Hydroxychloroquine                        | 144/209 (68.9%)       | 105/142 (73.9%)            | 0.367           |
| Corticosteroids                           | 42/208 (20.2%)        | 28/141 (19.9%)             | 0.952           |
| Antibiotics                               | 182/215 (84.7%)       | 122/143 (85.3%)            | 0.983           |
| Tocilizumab                               | 6 (2.5%)              | 16 (8.6%)                  | 0.010           |
| Low-molecular-weight heparin              | 34/112 (30.4%)        | 45/64 (70.3%)              | <0.0001         |
| <b>Outcomes</b>                           |                       |                            |                 |
| Median duration of hospitalization (days) | 10 (5-18)             | 9 (4-25)                   | 0.216           |
| Respiratory Failure                       | 122 (51.0%)           | 123 (65.8%)                | 0.003           |
| Acute kidney injury                       | 5 (2.1%)              | 21 (11.2%)                 | 0.0002          |
| Septic Shock                              | 0                     | 7 (3.7%)                   | 0.009           |
| Thromboembolic events                     | 5 (2.1%)              | 2 (1.1%)                   | 0.660           |
| Acute cardiac injury                      | 3 (1.3%)              | 11 (5.9%)                  | 0.017           |

Data are expressed as median (interquartile range) or n (%).
